# Supplementary material for: Locking excitons in two-dimensional emitting layers for efficient monochrome and white organic light-emitting diodes
Source: Royal Society of Chemistry journal article supplement (doi:10.1039/c9tc02768h), 2019-01-01
Supplement: c9tc02768h1.pdf [file c9tc02768h1.pdf]

# Supporting Information

## **Locking Excitons in Two-Dimensional Emitting Layers for Efficient Monochrome and White Organic Light-Emitting Diodes**

Yuan Liu, Christian Hähnisch, Zhongbin Wu, Paul-Anton Will, Felix Fries, Jinhan Wu, Simone Lenk, Karl Leo, and Sebastian Reineke\*

Dresden Integrated Center for Applied Physics and Photonic Materials (IAPP) and Institute for Applied Physics, Technische Universität Dresden, Hermann-Krone-Bau, Nöthnitzer Str. 61, 01187 Dresden, Germany

### **Corresponding Author**

\*E-mail: [sebastian.reineke@tu-dresden.de](mailto:sebastian.reineke@tu-dresden.de)

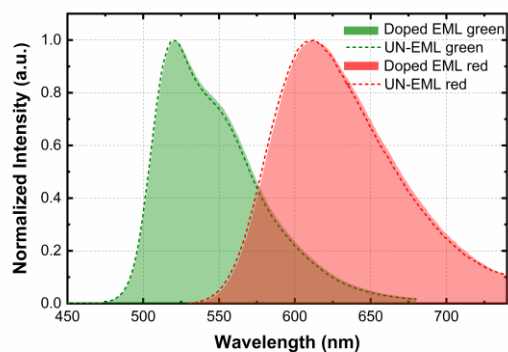

**Fig. S1** PL spectra of UN-EMLs and doped EMLs. The device structure is quartz/50 nm mCP:B3PYMPM:Ir(ppy)<sub>2</sub>(acac) (1:1, 8 wt%) for doped green EML, quartz/50 nm mCP:B3PYMPM:Ir(MDQ)<sub>2</sub>(acac) (1:1, 10 wt%) for doped red EML, quartz/3 nm mCP:B3PYMPM (1:1)/[0.1 nm Ir(ppy)<sub>2</sub>(acac)/5 nm mCP:B3PYMPM (1:1)]<sub>5</sub>/0.1 nm Ir(ppy)<sub>2</sub>(acac)/3 nm mCP:B3PYMPM (1:1) for green UN-EML and quartz/3 nm mCP:B3PYMPM (1:1)/[0.1 nm Ir(MDQ)<sub>2</sub>(acac)/5 nm mCP:B3PYMPM (1:1)]<sub>5</sub>/0.1 nm Ir(MDQ)<sub>2</sub>(acac)/3 nm mCP:B3PYMPM (1:1) for red UN-EML, respectively.

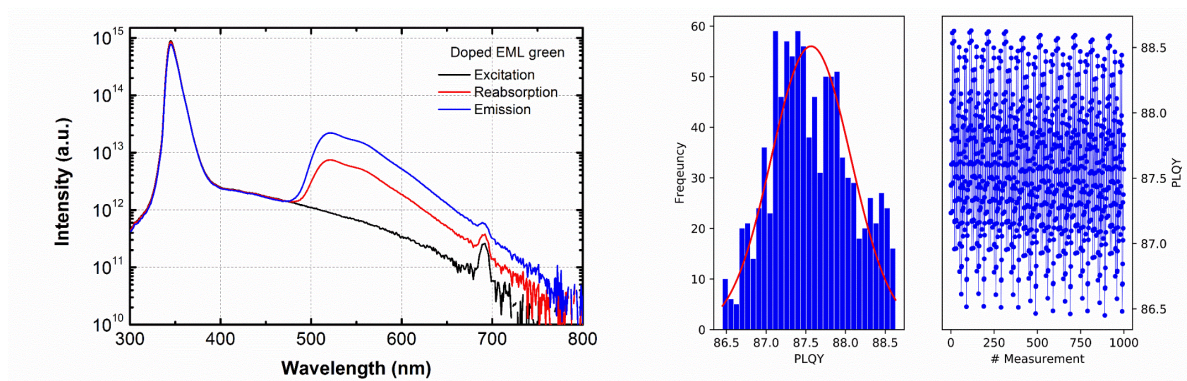

**Fig. S2** PLQY of green doped EML with a structure of quartz/50 nm mCP:B3PYMPM:Ir(ppy)<sub>2</sub>(acac) (1:1, 8 wt%).

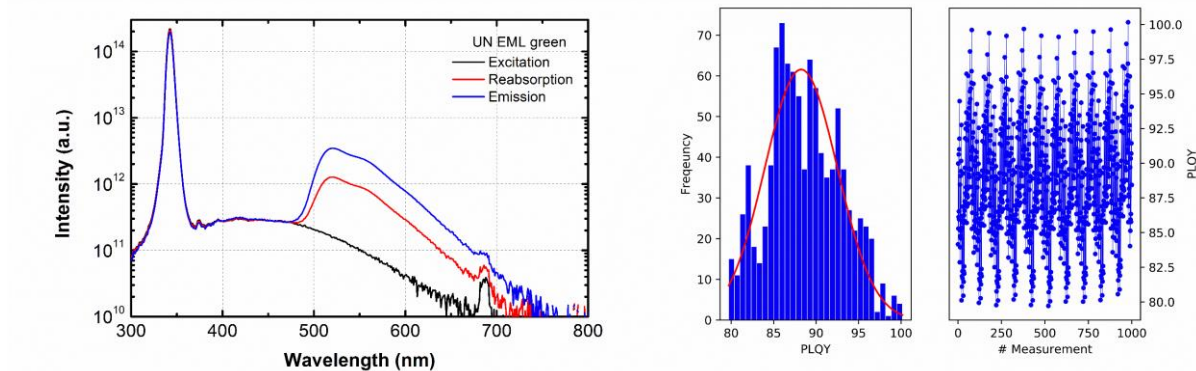

**Fig. S3** PLQY of green UN-EML with a structure of quartz/3 nm mCP:B3PYMPM (1:1)/[0.1 nm Ir(ppy)<sub>2</sub>(acac)/5 nm mCP:B3PYMPM (1:1)]<sub>5</sub>/0.1 nm Ir(ppy)<sub>2</sub>(acac)/3 nm mCP:B3PYMPM (1:1).

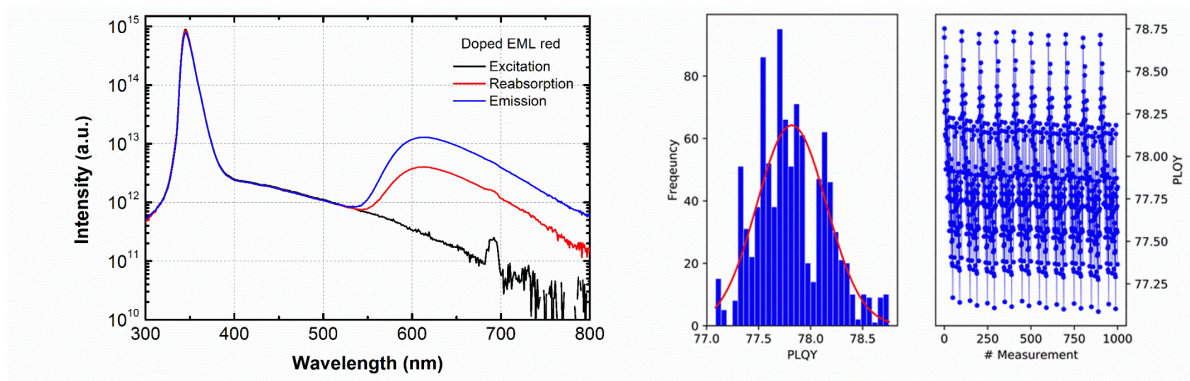

**Fig. S4** PLQY of red doped EML with a structure of quartz/50 nm mCP:B3PYMPM:Ir(MDQ)<sub>2</sub>(acac) (1:1, 10 wt%).

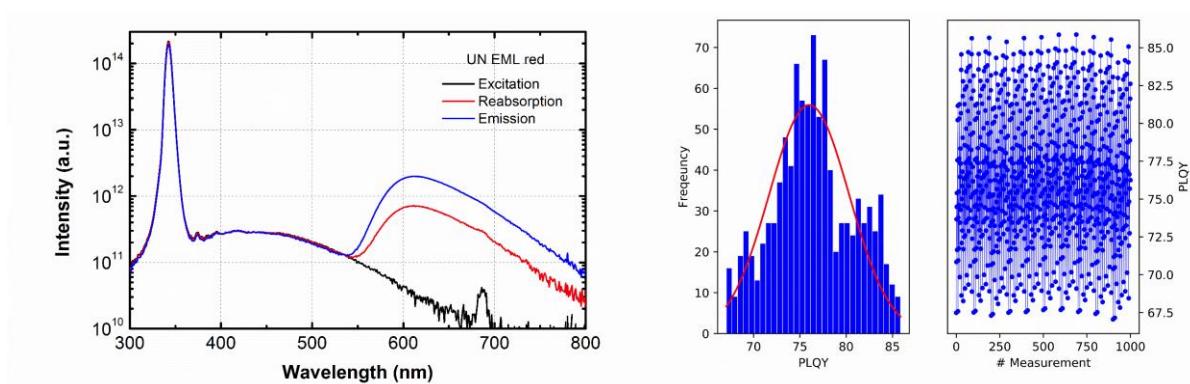

**Fig. S5** PLQY of green UN-EML with a structure of quartz/3 nm mCP:B3PYMPM (1:1)/[0.1 nm Ir(MDQ)<sub>2</sub>(acac)/5 nm mCP:B3PYMPM (1:1)]<sub>5</sub>/0.1 nm Ir(MDQ)<sub>2</sub>(acac)/3 nm mCP:B3PYMPM (1:1).

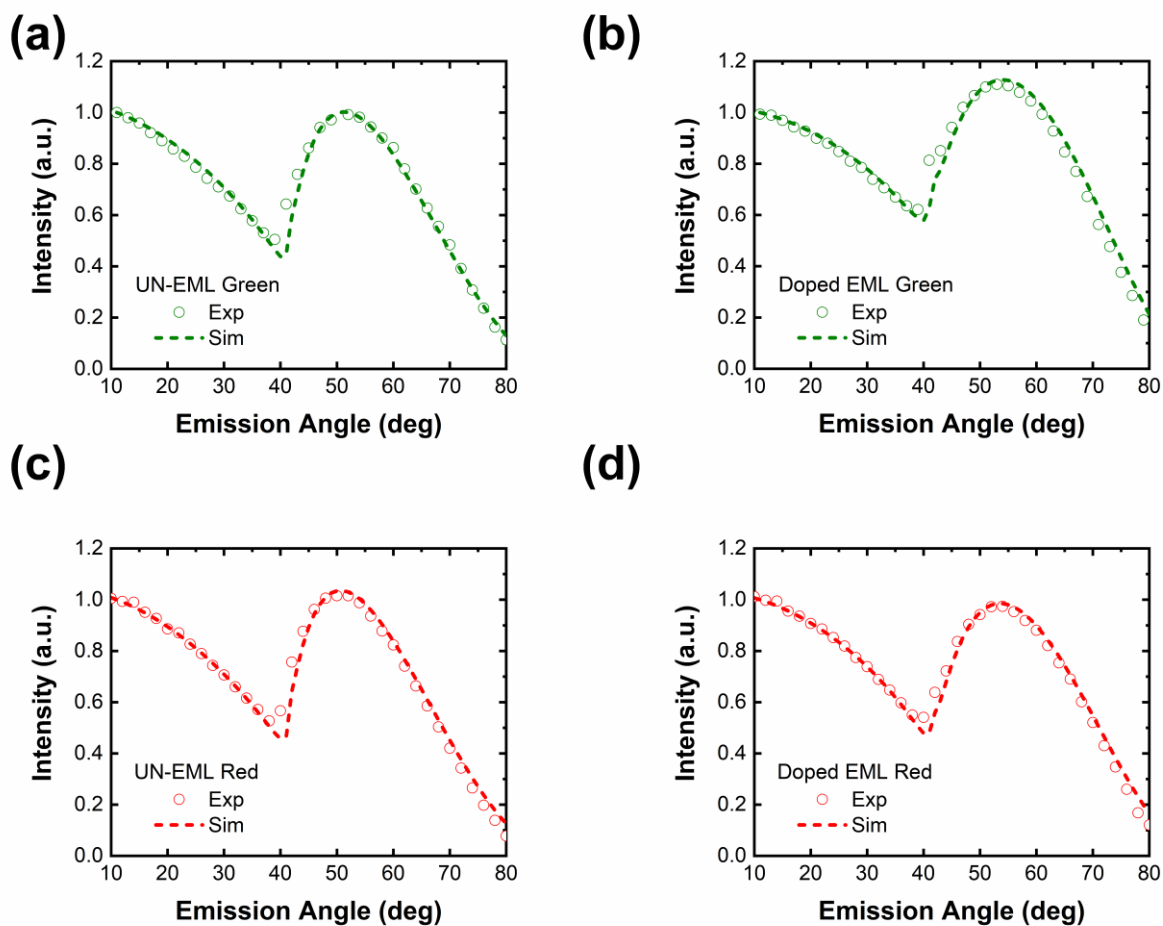

**Fig. S6** Measured (dots) and fitted (dashed lines) angular emission spectra of (a) green UN-EML, (b) green doped EML, (c) red UN-EML and (d) red doped EMLs. The fits are performed at the emission peak wavelengths which are 520 nm for the green and 610 nm for the red emitter.

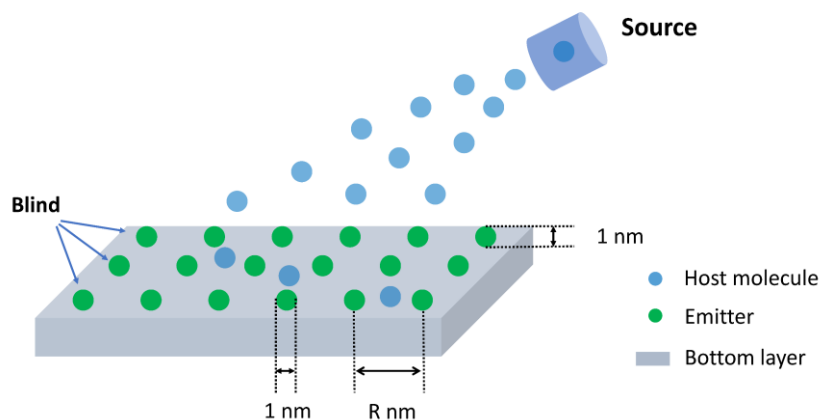

**Fig. S7** Deposition process of UN-EML. Roughly, the 0.1 nm sub monolayer reaches 10 mol% by treating all molecules as nanoballs with 1 nm diameter and assuming only 1 nm is needed to form a continuous film.

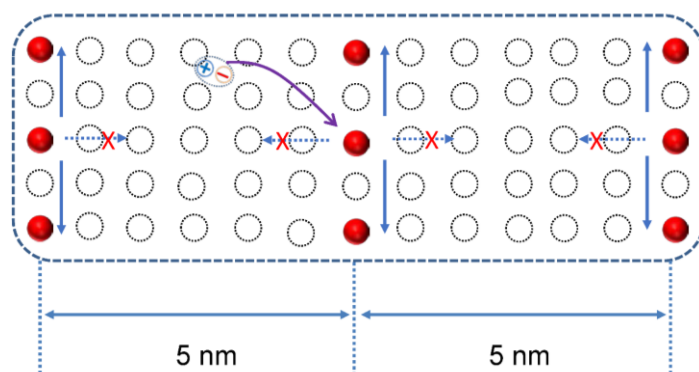

**Fig. S8** Exciton diffusion and transfer routes in the UN-EML. The red ball and the black circle represent the emitter and CT-host, respectively. The purple arrow indicates the exciton transfer from charge-transfer hosts to emitters. After the excitons captured by the emitters, exciton diffusion between emitters occurs, which is a prerequisite for TTA via Dexter transfer. Due to the ultrathin body of the emitting layer and high triplet energy of both donor and acceptor materials of the CT-host system, the exciton diffusion in the direction perpendicular to the substrate is suppressed (blue dash arrows). Therefore, the exciton diffusion is locked in two-dimensional planes (blue arrows).

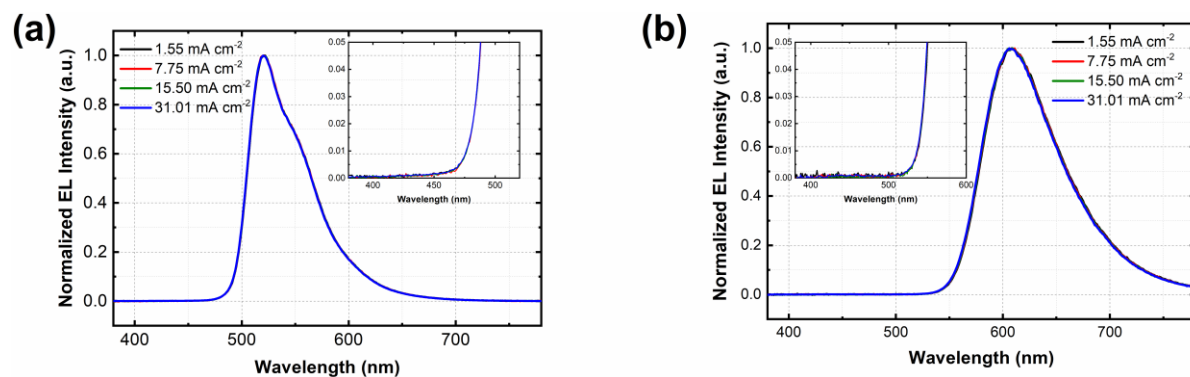

**Fig. S9** Spectra of (a) green and (b) red OLEDs based on UN-EML under different current densities. Insets are the magnified plots.

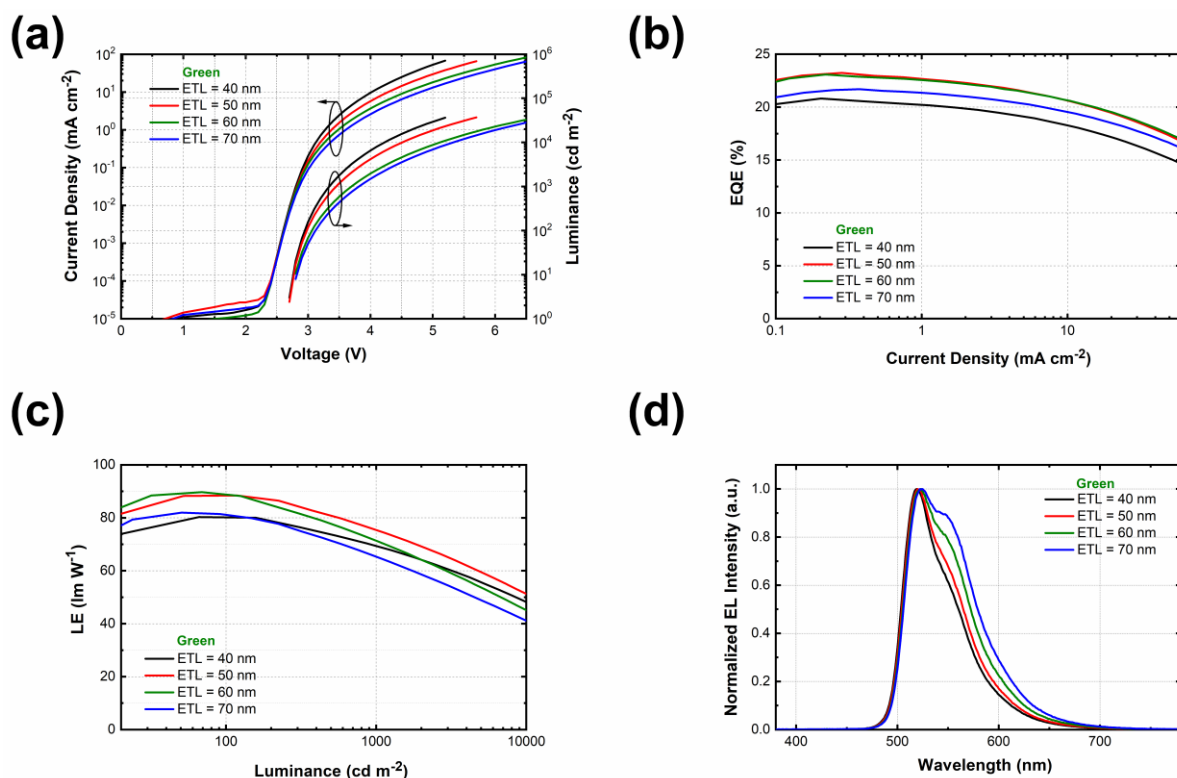

**Fig. S10** (a) Current density-voltage-luminance curves, (b) EQE along with current density, (d) Luminous efficacy curves as function with luminance and (d) Normalized electroluminescent spectra at  $15.4 \text{ mA cm}^{-2}$  of monochrome green OLEDs with different thickness of the electron transport layer.

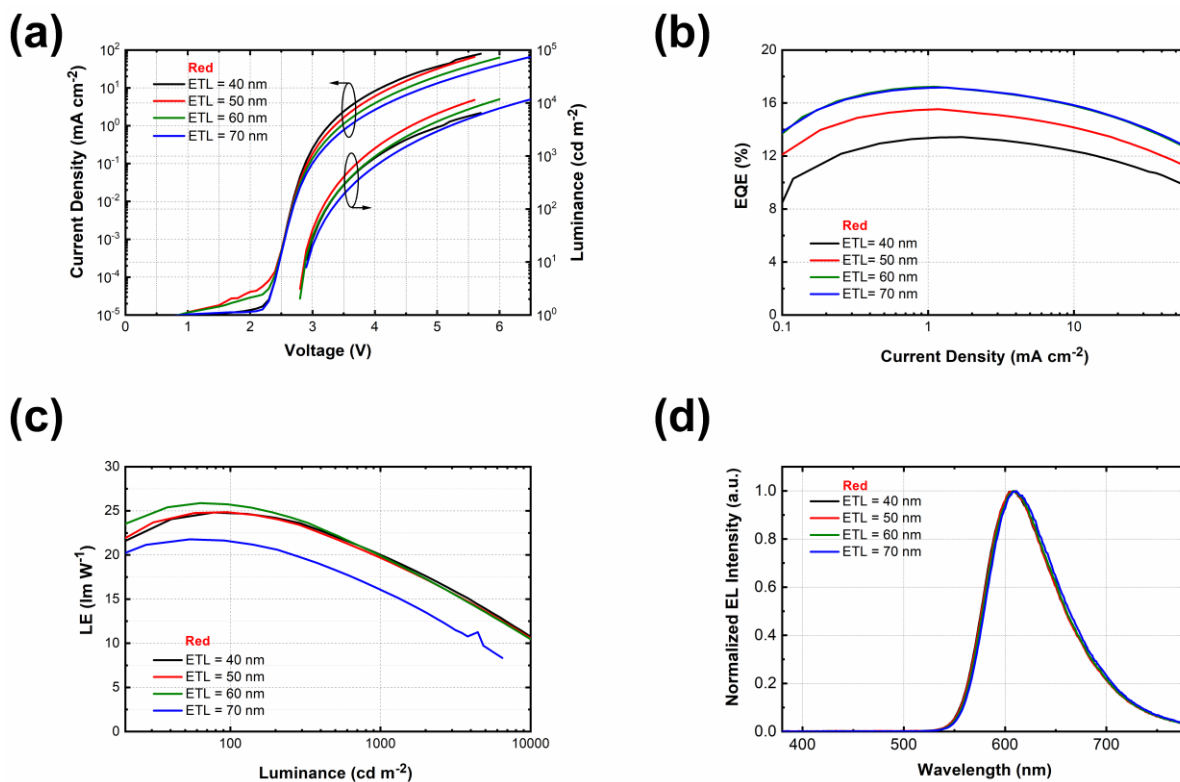

**Fig. S11** (a) Current density-voltage-luminance curves, (b) EQE along with current density, (d) Luminous efficacy curves as function with luminance and (d) Normalized electroluminescent spectra at 15.4 mA cm<sup>-2</sup> of monochrome red OLEDs with different thickness of the electron transport layer.

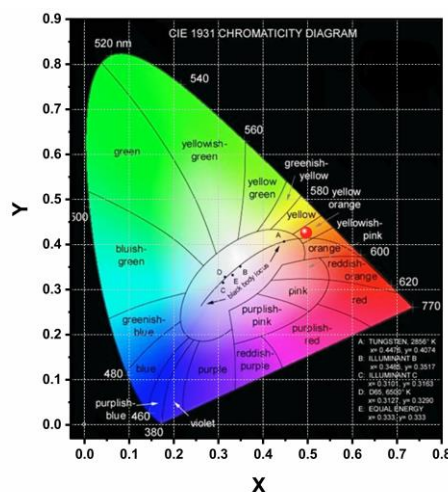

**Fig. S12** CIE of white OLED W2.

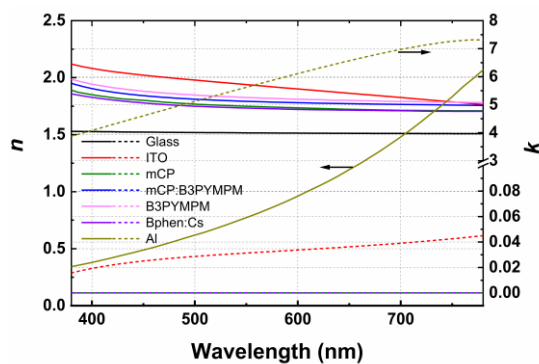

**Fig. S13** Refractive index of the materials used in the simulation. The solid lines are the real parts of refractive index  $n$  and the dashed lines are the imaginary parts refractive index i.e. extinction coefficient  $k$ .

**Table S1** Summary of parameters determined by the time-resolved PL curves at low and high excitation densities.

|                                           | Exciton density<br>(10 <sup>18</sup> cm <sup>-3</sup> ) | Exciton lifetime $\tau$<br>( $\mu$ s) | $k_{TT}$<br>(10 <sup>-12</sup> cm <sup>3</sup> s <sup>-1</sup> ) |
|-------------------------------------------|---------------------------------------------------------|---------------------------------------|------------------------------------------------------------------|
| Doped EML<br>/Ir(ppy) <sub>2</sub> (acac) | 0.7 $\pm$ 0.3                                           | 1.53 $\pm$ 0.05                       | 0.8 $\pm$ 0.3                                                    |
|                                           | 2.3 $\pm$ 0.8                                           | 1.53 $\pm$ 0.05                       | 0.6 $\pm$ 0.2                                                    |
| Doped EML<br>/Ir(MDQ) <sub>2</sub> (acac) | 0.8 $\pm$ 0.3                                           | 2.00 $\pm$ 0.05                       | 0.8 $\pm$ 0.3                                                    |
|                                           | 2.8 $\pm$ 1.0                                           | 2.07 $\pm$ 0.05                       | 0.5 $\pm$ 0.2                                                    |

|                |                                        |           |             |           |
|----------------|----------------------------------------|-----------|-------------|-----------|
| Extreme case 1 | UN-EML<br>/Ir(ppy) <sub>2</sub> (acac) | 0.7 ± 0.3 | 1.65 ± 0.05 | 0.9 ± 0.4 |
|                |                                        | 2.2 ± 0.8 | 1.70 ± 0.05 | 0.7 ± 0.3 |
|                | UN-EML<br>/Ir(MDQ) <sub>2</sub> (acac) | 0.8 ± 0.3 | 2.14 ± 0.05 | 0.8 ± 0.3 |
|                |                                        | 2.7 ± 1.0 | 2.32 ± 0.05 | 0.6 ± 0.2 |
| Extreme case 2 | UN-EML<br>/Ir(ppy) <sub>2</sub> (acac) | 3.6 ± 1.2 | 1.63 ± 0.05 | 0.2 ± 0.1 |
|                |                                        | 12 ± 4    | 1.70 ± 0.05 | 0.1 ± 0.1 |
|                | UN-EML<br>/Ir(MDQ) <sub>2</sub> (acac) | 4.2 ± 1.5 | 2.14 ± 0.05 | 0.2 ± 0.1 |
|                |                                        | 14 ± 5    | 2.31 ± 0.05 | 0.1 ± 0.1 |
